# Supplementary material for: Carbon monoxide adsorption on the single-walled carbon nanotube supported gold–silver nanoalloys
Source: Royal Society of Chemistry journal article supplement (doi:10.1039/c5nj01382h), 2015-10-30

## Supporting Information

### Carbon Monoxide Adsorption on the Single-Walled Carbon Nanotube Supported Gold-Silver Nanoalloys

Hamed Akbarzadeh, Mohsen Abbaspour, Sirous Salemi

New Journal of Chemistry (21-Oct-2015)

**Table 1.** The QSC potential parameters for the different interactions

| Interaction | $\epsilon$ (ev) | $\sigma$ (Å) | n  | m | C       |
|-------------|-----------------|--------------|----|---|---------|
| Ag-Ag       | 0.0039450       | 4.0691       | 11 | 6 | 96.524  |
| Au-Au       | 0.0078052       | 4.0651       | 11 | 8 | 53.581  |
| Au-Ag       | 0.0055490       | 4.0671       | 11 | 7 | 75.0525 |

**Table 2.** The LJ potential parameters for the different interactions

| Interaction      | $\epsilon$ (ev) | $\sigma$ (Å) |
|------------------|-----------------|--------------|
| Ag - C (CNT)     | 0.030100        | 3.0650       |
| Au - C (CNT)     | 0.034070        | 3.0030       |
| Ag - C (CO)      | 0.039610        | 3.0370       |
| Au - C (CO)      | 0.044830        | 3.0335       |
| C (CO) - C (CO)  | 0.004553        | 3.4300       |
| O (CO) - O (CO)  | 0.002601        | 3.1200       |
| C (CO) - O (CO)  | 0.003441        | 3.2750       |
| C (CO) - C (CNT) | 0.003460        | 3.3995       |
| O (CO) - C (CNT) | 0.002615        | 3.2445       |
| Au - O (CO)      | 0.033886        | 2.8785       |
| Ag - O (CO)      | 0.029940        | 2.8820       |

**Table 3.** The details of the carbon nanotubes used in our simulations.

| nanotube<br>(n, m) | CNT diameter<br>(nm) |
|--------------------|----------------------|
| (20, 0)            | 1.5                  |
| (26, 0)            | 2.0                  |
| (32, 0)            | 2.5                  |
| (38, 0)            | 3.0                  |
| (45, 0)            | 3.5                  |
| (11, 11)           | 1.5                  |
| (15, 15)           | 2.0                  |
| (19, 19)           | 2.5                  |
| (22, 22)           | 3.0                  |
| (26, 26)           | 3.5                  |

We have also presented the snapshots of the CO adsorption and also the structure changes of the Ag-Au<sub>256</sub> nanoalloy with the  $x_{Au} = 0.5$  supported on the (18,0) CNT at 300 K in the supporting information (Figure S1). The left panel shows the adsorption of the CO molecules on the supported nanocluster. The right panel (up) shows the nanocluster before the inserting pressure (in vacuum) and the panel down shows the structure of the nanocluster after inserting the pressure by the gas.

Figure S1

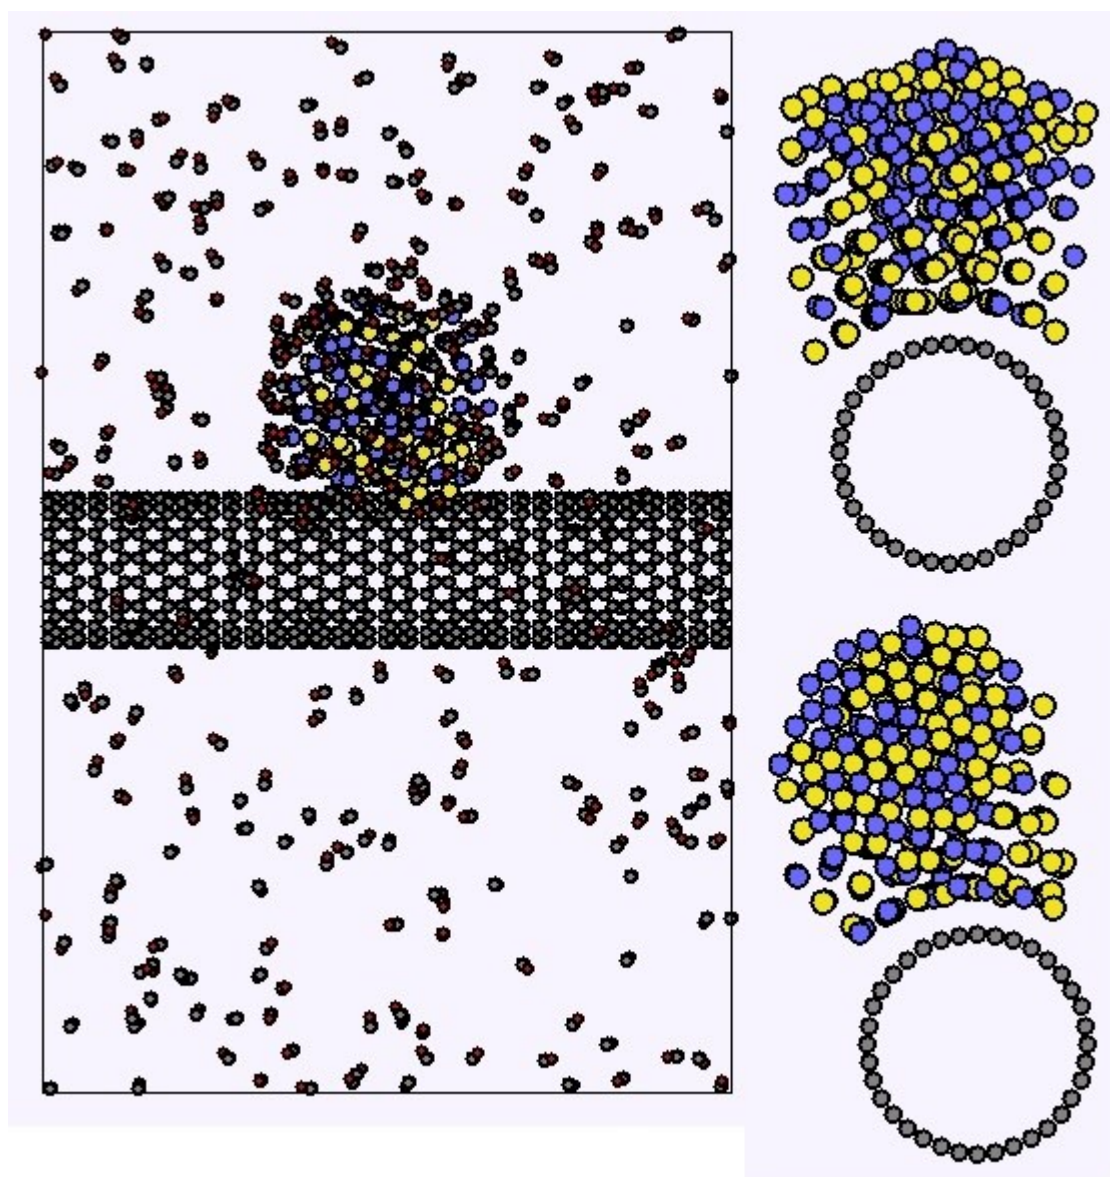

Supplement: c5nj01382h1.pdf [file c5nj01382h1.pdf]
